# Supplementary material for: Disruption of Lysosome Function Promotes Tumor Growth and Metastasis in Drosophila
Source: PubMed Central journal article supplement — J Biol Chem. 2010 Apr 25;285(28):21817–23. doi: 10.1074/jbc.M110.131714 (PMC2898421; doi:10.1074/jbc.m110.131714), 2010-04-25

### **SUPPLEMENTAL FIGURE LEGENDS**

Supplemental Fig. 1. Metastasis of *Ras<sup>V12</sup>/dor<sup>-</sup>* tumor is *Ras<sup>V12</sup>* and *JNK* dependent. Dorsal views of dissected cephalic complexes from third-instar larva of indicated genotypes were shown.

Supplemental Figure 1

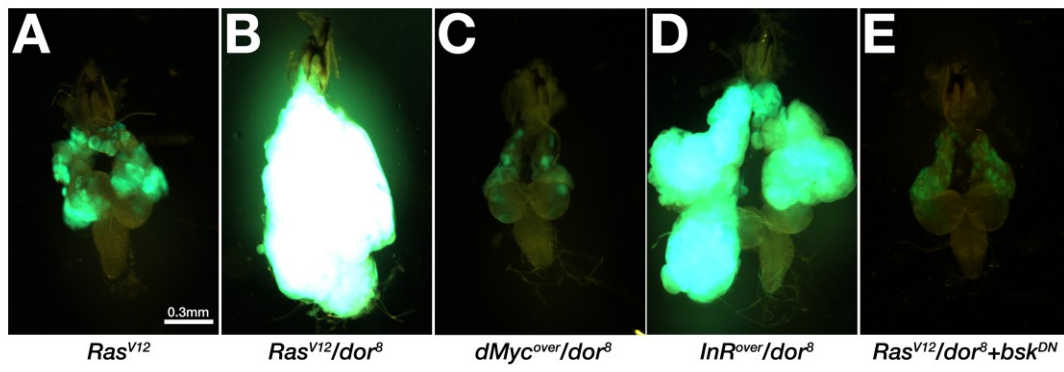

Supplement: supp_M110.131714_jbc.M110.131714-1.pdf [file supp_M110.131714_jbc.M110.131714-1.pdf]
